# Supplementary material for: Evaluation and comparison of recombinase polymerase amplification coupled with lateral-flow bioassay for Escherichia coli O157:H7 detection using diifeerent genes
Source: PubMed Central journal article supplement (PMC7820579; doi:10.1038/s41598-021-81312-6), 2021-01-21
Supplement: 41598_2021_81312_MOESM1_ESM.pdf [file 41598_2021_81312_MOESM1_ESM.pdf]

## Supplementary Document

### **Evaluation and comparison of Recombinase polymerase amplification coupled with lateral-flow bioassay for *Escherichia coli* O157: H7 detection using different genes**

Alka Rani<sup>a\*</sup>, Vivek B Ravindran<sup>a</sup>, Aravind Surapaneni<sup>c,d</sup>, Esmaeil Shahsavari<sup>a</sup>, Nagalakshmi Haleyur<sup>a</sup>, Nitin Mantri<sup>b</sup>, Andrew S Ball<sup>a,d</sup>

<sup>a</sup> *School of Science, RMIT University, Bundoora West, Victoria 3083, Australia*

<sup>b</sup> *The Pangenomics Group, School of Science, RMIT University, Melbourne, VIC, 3083, Australia*

<sup>c</sup> *South East Water, Frankston, Victoria, Australia*

<sup>d</sup> *ARC Training Centre for the Transformation of Australia's Biosolids Resource, RMIT University, Bundoora West, Victoria 3083, Australia*

\*Correspondence: [alka.rani@rmit.edu.au](mailto:alka.rani@rmit.edu.au). Tel: +61399256594

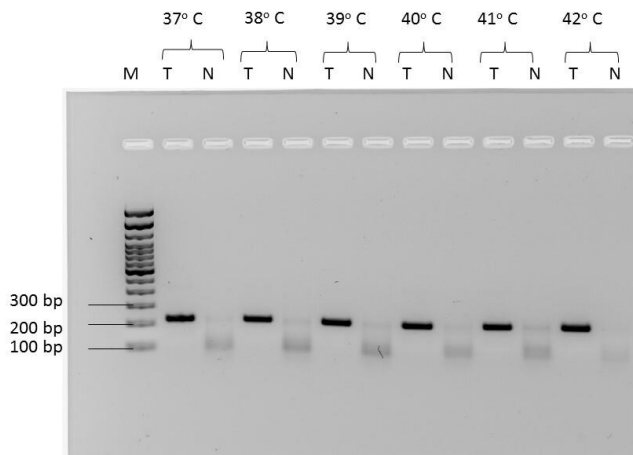

**Figure S1:** Temperature optimization of *rfbE* F1/R1 primer set by RPA-EF assay. Lane 1: Molecular marker 100 bp; from left to right, lane 2,4,6,8,10 and 12 have RPA of *E. coli* O157:H7 template (**T**) at 37° C, 38° C, 39° C, 40° C, 41° C and 42° C respectively. Lane 3, 5, 7, 9, 11 and 13 have non-template control (**NTC**) at 37° C, 38° C, 39° C, 40° C, 41° C and 42° C respectively. M= Molecular marker, T= template, N= non-template control.

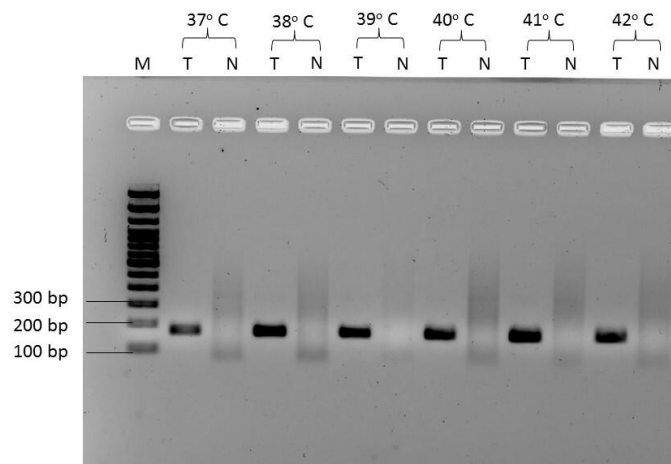

**Figure S2:** Temperature optimization of *fliC* F1/R1 primer set by RPA-EF assay. Lane 1: Molecular marker 100 bp; from left to right, lane 2, 4, 6, 8, 10 and 12 have RPA of *E. coli* O157:H7 template (**T**) at 37° C, 38° C, 39° C, 40° C, 41° C, 42° C respectively. Lane 3, 5, 7, 9, 11 and 13 have non-template control (**NTC**) at 37° C, 38° C, 39° C, 40° C, 41° C, 42° C respectively. M= Molecular marker, T= template, N= non-template control.

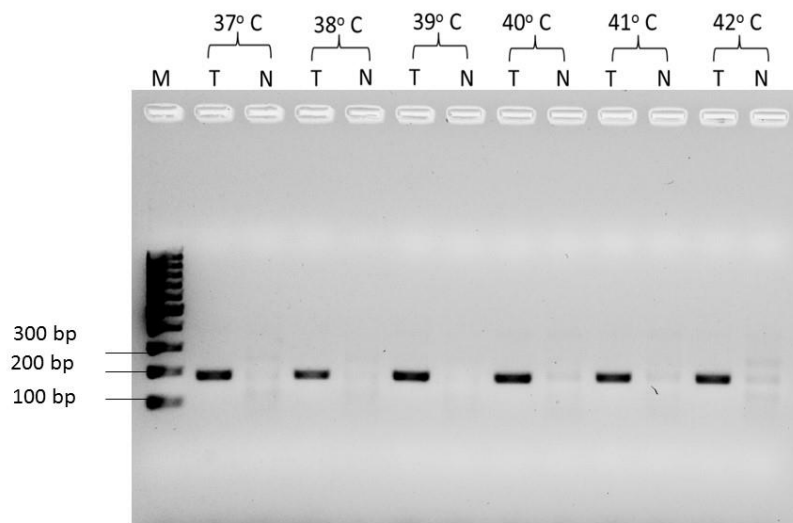

**Figure S3:** Temperature optimization of stx2 F1/R1 primer set by RPA-EF assay. Lane 1: Molecular marker 100 bp; from left to right, lane 2, 4, 6, 8, 10 and 12 have RPA of *E. coli* O157:H7 template (T) at 37° C, 38° C, 39° C, 40° C, 41° C and 42° C respectively. Lane 3, 5, 7, 9, 11 and 13 have non-template control (NTC) at 37° C, 38° C, 39° C, 40° C, 41° C and 42° C respectively. M= Molecular marker, T= template, N= non-template control.

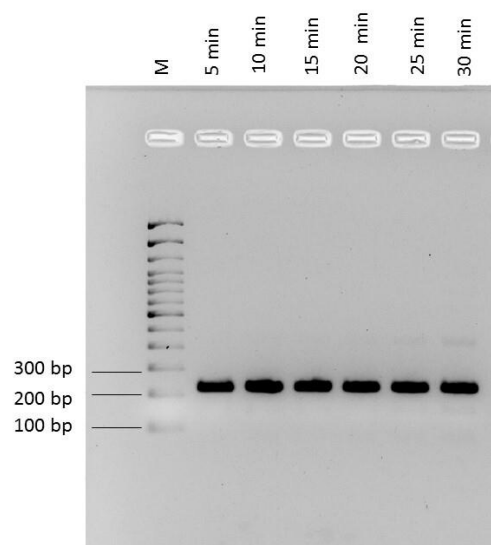

**Figure S4:** Optimization of reaction time for primer set rfbE F1/R1 with RPA-EF assay. Lane M: Molecular marker 100 bp, lane 2-7: different time incubation from 5 minutes to 30 minutes by using the same amount of template (2 ng).

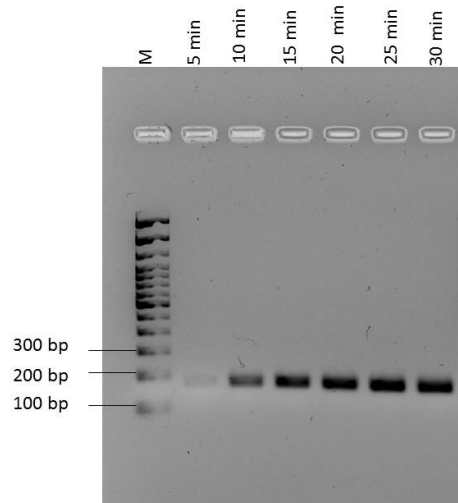

**Figure S5:** Optimization of reaction time for primer set fliC F2/R2 with RPA-EF assay. Lane M: Molecular marker 100 bp, lane 2-7: different time incubation from 5 minutes to 30 minutes by using the same amount of template (2 ng).

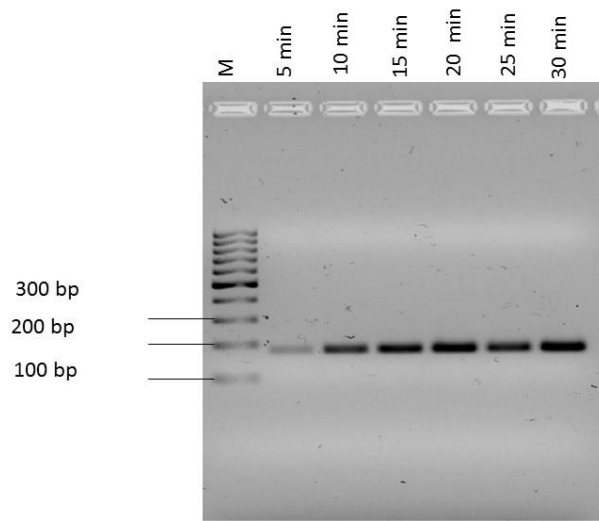

**Figure S6:** Optimization of reaction time for primer set stx2 F1/R1 with RPA-EF assay. Lane M: Molecular marker 100 bp, lane 2-7: different time incubation from 5 minutes to 30 minutes by using the same amount of template (2 ng).
